# Supplementary material for: The case for using Mapped Exonic Non-Duplicate (MEND) read counts in RNA-Seq experiments: examples from pediatric cancer datasets
Source: bioRxiv or medRxiv preprint supplement (doi:10.1101/716829), 2020-08-26
Supplement: Supplementary file [file media-1.pdf]

# Supplemental Materials

## Methods

### **Predicting total reads**

We predicted the total number of reads that would be required to obtain the number of MEND reads required for a threshold. Specifically, for each of 765 RNA-Seq samples, we determined the factor required to transform the number of existing MEND reads to the desired number of MEND reads, and then performed the same transformation on the remaining read types (e.g. duplicate, not mapped, etc). This number is an estimate because the fraction of non-duplicate reads, and thus MEND reads, is not consistent across depths. The same library, sequenced more deeply, will have a greater fraction of computationally detected duplicates because the universe of possible non-duplicate reads decreases with every additional read.

### **Predicting duration of pipelines**

Timestamps were recorded before and after each step of each pipeline for each sample. Because both pipelines have steps that are not dependent on input size (e.g. loading reference files into memory), a start-up time for each pipeline was estimated based on the median amount of time required to process a sample containing 1 million total reads. That time was subtracted from the duration of the pipeline, and the remaining adjusted duration was used to calculate the speed of the pipeline in minutes per million total reads. The median speed plus median startup time was used for predicting total pipeline duration for arbitrary read depths.

# Tables

**Table S1. Sample Information**

| Sample | Treehouse ID   | Project information                                                                                                                | Sample ID in project            | Age |
|--------|----------------|------------------------------------------------------------------------------------------------------------------------------------|---------------------------------|-----|
| S1     | THR28_0688_S01 | SRA: SRP040454                                                                                                                     | SRR1201253                      | 15  |
| S2     | THR14_0298_S01 | <a href="https://doi.org/10.24370/SD_BHJXBDQK">https://doi.org/10.24370/SD_BHJXBDQK</a>                                            | C15990                          | 1.7 |
| S3     | THR17_0392_S01 | EGA: EGAD00001000158,<br><a href="https://dx.doi.org/10.1038/nature11327">https://dx.doi.org/10.1038/nature11327</a>               | EGAZ00001000212_81CMBA<br>BXX_3 | 4.5 |
| S4     | THR31_0892_S01 | dbGap: phs000673.v2.p1,<br><a href="https://dx.doi.org/10.1001/jama.2015.10080">https://dx.doi.org/10.1001/jama.2015.10080</a>     | 52                              | <30 |
| S5     | THR32_0941_S01 | EGA: EGAD00001001927,<br><a href="https://dx.doi.org/10.1016/j.cell.2016.01.015">https://dx.doi.org/10.1016/j.cell.2016.01.015</a> | dkfz_CNS-PNET_15-0069           | 3   |

**Table S2. Sample read type composition**

(Percent MMoM is the fraction of mapped reads that are multi-mapped, i.e.. multi-mapped of mapped)

| ID | Total sequences | Not mapped | Duplicates | Non-exonic | MEND       | Percent MEND | Percent MMoM |
|----|-----------------|------------|------------|------------|------------|--------------|--------------|
| S1 | 128,535,112     | 4,835,735  | 42,042,547 | 13,092,258 | 68,564,572 | 53.3         | 8.2          |
| S2 | 90,208,409      | 3,153,361  | 28,542,492 | 4,155,515  | 54,357,041 | 60.3         | 9.1          |
| S3 | 84,452,915      | 5,555,879  | 13,178,433 | 15,510,051 | 50,208,552 | 59.5         | 6.9          |
| S4 | 109,466,113     | 4,779,467  | 42,401,564 | 4,410,048  | 57,875,034 | 52.9         | 4.3          |
| S5 | 109,226,298     | 1,463,129  | 34,803,665 | 5,056,818  | 67,902,686 | 62.2         | 8            |

**Table S3. Sub-sample read type composition**

(Percent MMoM is the fraction of mapped reads that are multi-mapped, i.e.. multi-mapped of mapped)

| ID | Target MEND Count (M) | Seed | Total sequences | Not mapped | Duplicates | Non exonic | MEND       | Percent MEND | Percent MMoM |
|----|-----------------------|------|-----------------|------------|------------|------------|------------|--------------|--------------|
| S1 | 1                     | 2771 | 1,191,561       | 44,931     | 32,840     | 144,746    | 969,044    | 81.3         | 8.2          |
| S1 | 4                     | 5411 | 5,242,557       | 197,506    | 391,682    | 631,010    | 4,022,360  | 76.7         | 8.2          |
| S1 | 8                     | 2622 | 10,907,904      | 411,416    | 1,223,836  | 1,299,434  | 7,973,218  | 73.1         | 8.2          |
| S1 | 12                    | 9311 | 16,876,470      | 634,535    | 2,357,704  | 1,994,906  | 11,889,325 | 70.4         | 8.2          |
| S1 | 16                    | 6933 | 23,145,211      | 870,759    | 3,749,472  | 2,527,112  | 15,997,869 | 69.1         | 8.2          |
| S1 | 20                    | 2226 | 29,709,318      | 1,118,269  | 5,389,331  | 3,227,528  | 19,974,190 | 67.2         | 8.2          |
| S1 | 24                    | 1120 | 36,559,290      | 1,376,837  | 7,261,258  | 3,946,870  | 23,974,325 | 65.6         | 8.2          |
| S1 | 28                    | 6451 | 43,665,129      | 1,642,663  | 9,351,746  | 4,694,195  | 27,976,525 | 64.1         | 8.2          |
| S1 | 32                    | 3920 | 51,002,535      | 1,919,972  | 11,649,902 | 5,459,935  | 31,972,726 | 62.7         | 8.2          |
| S1 | 36                    | 7519 | 58,558,309      | 2,203,450  | 14,154,168 | 6,232,705  | 35,967,986 | 61.4         | 8.2          |
| S1 | 40                    | 4956 | 66,343,416      | 2,496,223  | 16,856,241 | 7,028,152  | 39,962,800 | 60.2         | 8.2          |
| S1 | 44                    | 7750 | 74,358,987      | 2,797,435  | 19,761,936 | 7,834,893  | 43,964,723 | 59.1         | 8.2          |
| S1 | 48                    | 9314 | 82,603,751      | 3,108,502  | 22,863,202 | 8,658,070  | 47,973,977 | 58.1         | 8.2          |
| S2 | 1                     | 7173 | 1,143,477       | 39,754     | 46,370     | 91,062     | 966,290    | 84.5         | 9.1          |
| S2 | 4                     | 2711 | 4,993,927       | 174,592    | 473,621    | 338,840    | 4,006,874  | 80.2         | 9.1          |
| S2 | 8                     | 1490 | 10,420,956      | 364,200    | 1,399,780  | 639,665    | 8,017,312  | 76.9         | 9.1          |
| S2 | 12                    | 3931 | 16,175,345      | 566,516    | 2,629,156  | 931,813    | 12,047,861 | 74.5         | 9.1          |
| S2 | 16                    | 3498 | 22,257,160      | 779,144    | 4,126,796  | 1,444,917  | 15,906,303 | 71.5         | 9.1          |
| S2 | 20                    | 3732 | 28,636,088      | 1,000,462  | 5,876,649  | 1,800,789  | 19,958,188 | 69.7         | 9.1          |
| S2 | 24                    | 4424 | 35,215,412      | 1,231,421  | 7,837,390  | 2,152,988  | 23,993,613 | 68.1         | 9.1          |
| S2 | 28                    | 5510 | 41,978,201      | 1,466,507  | 9,992,408  | 2,510,114  | 28,009,172 | 66.7         | 9.1          |
| S2 | 32                    | 4233 | 48,922,115      | 1,710,060  | 12,345,431 | 2,871,763  | 31,994,861 | 65.4         | 9.1          |
| S2 | 36                    | 1259 | 56,088,802      | 1,961,176  | 14,893,202 | 3,234,947  | 35,999,477 | 64.2         | 9.1          |
| S2 | 40                    | 8596 | 63,469,370      | 2,217,871  | 17,648,382 | 3,602,206  | 40,000,910 | 63           | 9.1          |
| S2 | 44                    | 6556 | 71,062,797      | 2,484,142  | 20,603,862 | 3,980,378  | 43,994,415 | 61.9         | 9.1          |
| S2 | 48                    | 7023 | 78,868,925      | 2,756,316  | 23,764,239 | 4,359,219  | 47,989,151 | 60.8         | 9.1          |
| S3 | 1                     | 7649 | 1,333,110       | 87,652     | 12,656     | 268,050    | 964,753    | 72.4         | 6.8          |
| S3 | 4                     | 8539 | 5,468,018       | 359,684    | 154,118    | 1,103,855  | 3,850,360  | 70.4         | 6.9          |
| S3 | 8                     | 7537 | 11,170,527      | 735,105    | 522,538    | 2,158,143  | 7,754,741  | 69.4         | 6.9          |

|    |    |      |            |           |            |            |            |      |     |
|----|----|------|------------|-----------|------------|------------|------------|------|-----|
| S3 | 12 | 5537 | 17,089,047 | 1,123,015 | 1,060,466  | 3,314,643  | 11,590,923 | 67.8 | 6.9 |
| S3 | 16 | 662  | 23,225,066 | 1,528,638 | 1,745,342  | 4,500,740  | 15,450,346 | 66.5 | 6.9 |
| S3 | 20 | 7248 | 29,566,535 | 1,945,301 | 2,573,368  | 5,729,301  | 19,318,564 | 65.3 | 6.9 |
| S3 | 24 | 6740 | 36,082,741 | 2,374,840 | 3,527,936  | 6,994,714  | 23,185,251 | 64.3 | 6.9 |
| S3 | 28 | 4433 | 42,807,901 | 2,815,162 | 4,614,248  | 8,281,769  | 27,096,721 | 63.3 | 6.9 |
| S3 | 32 | 8154 | 49,615,635 | 3,266,617 | 5,811,608  | 9,585,236  | 30,952,174 | 62.4 | 6.9 |
| S3 | 36 | 4791 | 56,421,595 | 3,711,929 | 7,098,102  | 10,877,421 | 34,734,143 | 61.6 | 6.9 |
| S3 | 40 | 2115 | 63,293,109 | 4,164,264 | 8,471,480  | 12,179,621 | 38,477,744 | 60.8 | 6.9 |
| S3 | 44 | 849  | 70,219,354 | 4,617,734 | 9,939,252  | 12,952,812 | 42,709,556 | 60.8 | 6.9 |
| S3 | 50 | 3541 | 80,704,867 | 5,309,035 | 12,295,582 | 14,839,989 | 48,260,261 | 59.8 | 6.9 |
| S4 | 1  | 5315 | 1,045,377  | 45,876    | 45,752     | 56,363     | 897,386    | 85.8 | 4.3 |
| S4 | 4  | 4596 | 5,043,401  | 219,745   | 561,849    | 223,190    | 4,038,617  | 80.1 | 4.3 |
| S4 | 8  | 2594 | 10,744,554 | 468,240   | 1,738,179  | 490,852    | 8,047,283  | 74.9 | 4.3 |
| S4 | 12 | 3263 | 16,860,169 | 736,956   | 3,329,810  | 785,977    | 12,007,426 | 71.2 | 4.3 |
| S4 | 16 | 2214 | 23,395,401 | 1,021,538 | 5,285,918  | 1,100,864  | 15,987,081 | 68.3 | 4.3 |
| S4 | 20 | 7447 | 30,319,271 | 1,323,675 | 7,582,848  | 1,435,276  | 19,977,472 | 65.9 | 4.3 |
| S4 | 24 | 734  | 37,446,782 | 1,635,768 | 10,132,510 | 1,777,813  | 23,900,692 | 63.8 | 4.3 |
| S4 | 28 | 8899 | 44,785,147 | 1,955,663 | 12,934,337 | 1,750,624  | 28,144,523 | 62.8 | 4.3 |
| S4 | 32 | 3452 | 52,394,319 | 2,287,791 | 15,986,324 | 2,064,188  | 32,056,016 | 61.2 | 4.3 |
| S4 | 36 | 8038 | 60,348,764 | 2,635,559 | 19,320,624 | 2,393,625  | 35,998,956 | 59.7 | 4.3 |
| S4 | 40 | 3320 | 68,626,163 | 2,995,634 | 22,937,514 | 2,733,306  | 39,959,708 | 58.2 | 4.3 |
| S4 | 44 | 3778 | 77,224,528 | 3,370,685 | 26,823,490 | 3,086,454  | 43,943,900 | 56.9 | 4.3 |
| S4 | 48 | 4374 | 86,145,326 | 3,759,043 | 30,981,409 | 3,456,192  | 47,948,682 | 55.7 | 4.3 |
| S5 | 1  | 8803 | 1,095,917  | 14,652    | 36,657     | 75,806     | 968,802    | 88.4 | 8   |
| S5 | 4  | 7362 | 4,768,333  | 63,729    | 388,644    | 326,465    | 3,989,495  | 83.7 | 7.9 |
| S5 | 8  | 4808 | 9,889,727  | 132,092   | 1,163,274  | 561,700    | 8,032,662  | 81.2 | 7.9 |
| S5 | 12 | 3737 | 15,263,801 | 203,986   | 2,194,178  | 865,464    | 12,000,172 | 78.6 | 8   |
| S5 | 16 | 7924 | 20,893,267 | 279,963   | 3,441,558  | 1,183,454  | 15,988,293 | 76.5 | 8   |
| S5 | 20 | 7125 | 26,762,540 | 358,672   | 4,900,294  | 1,512,722  | 19,990,853 | 74.7 | 8   |
| S5 | 24 | 1819 | 32,823,979 | 439,686   | 6,537,826  | 1,855,955  | 23,990,511 | 73.1 | 8   |
| S5 | 28 | 2542 | 39,075,013 | 524,456   | 8,353,716  | 2,207,201  | 27,989,640 | 71.6 | 8   |
| S5 | 32 | 1872 | 45,508,328 | 610,341   | 10,343,082 | 2,564,317  | 31,990,588 | 70.3 | 8   |
| S5 | 36 | 2104 | 52,114,856 | 698,827   | 12,498,577 | 2,929,734  | 35,987,718 | 69.1 | 7.9 |
| S5 | 40 | 753  | 58,896,397 | 788,996   | 14,819,092 | 3,304,205  | 39,984,105 | 67.9 | 8   |

|    |    |      |            |         |            |           |            |      |   |
|----|----|------|------------|---------|------------|-----------|------------|------|---|
| S5 | 44 | 6788 | 65,854,950 | 882,393 | 17,302,914 | 3,686,839 | 43,982,804 | 66.8 | 8 |
| S5 | 48 | 8931 | 72,989,829 | 977,023 | 19,952,874 | 4,072,439 | 47,987,492 | 65.7 | 8 |

# Figures

## Figure S1

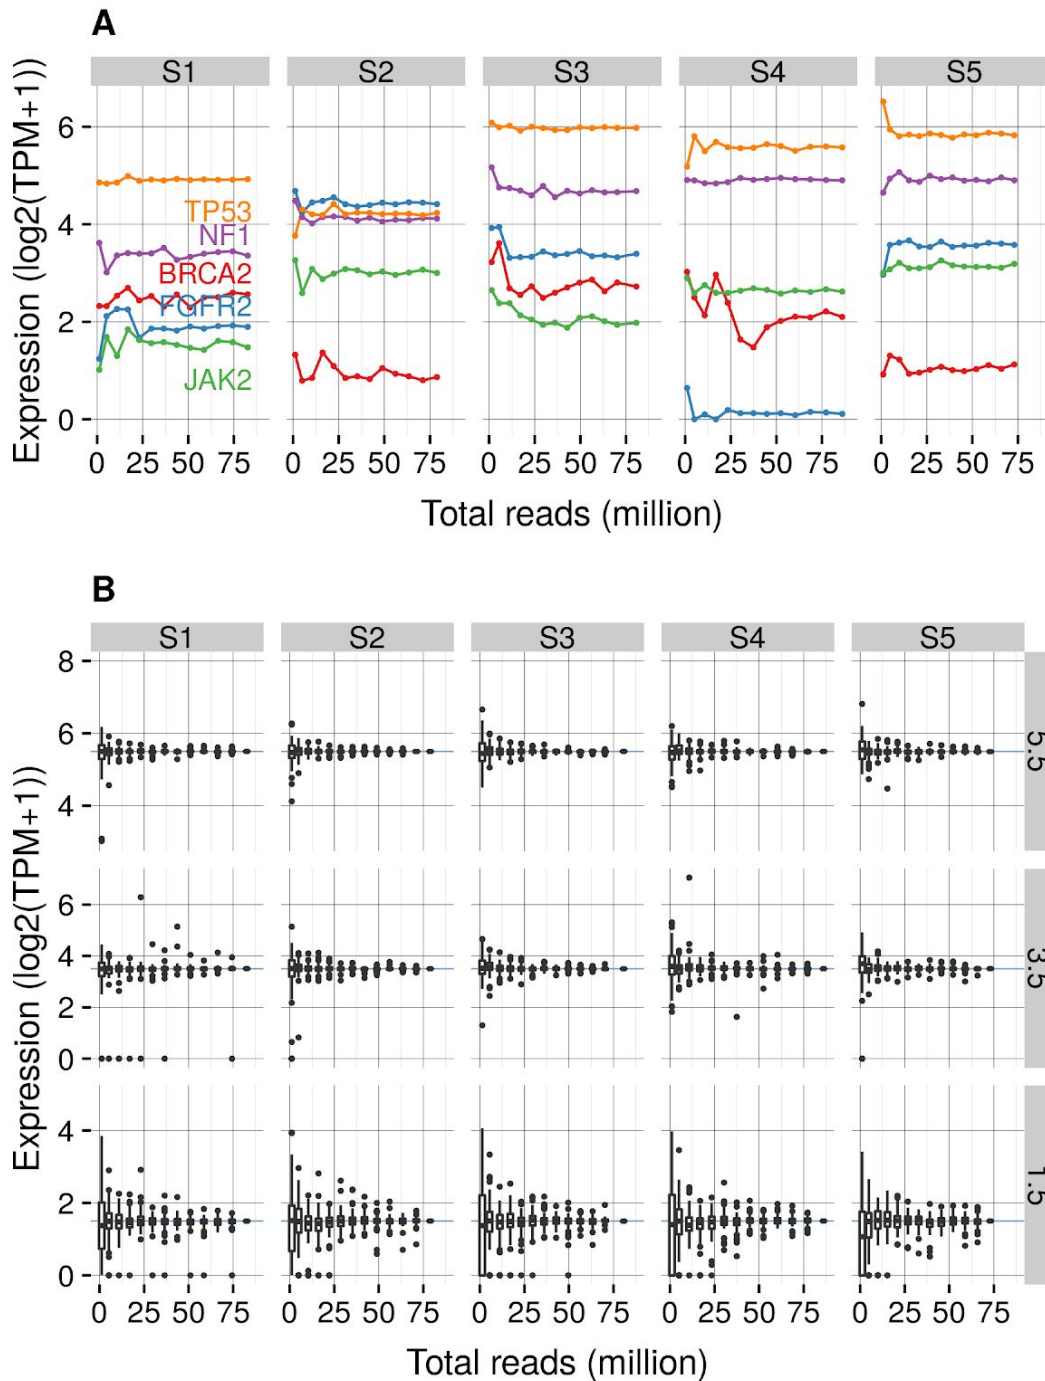

**Figure S1. Reproducibility of gene expression measurement increases with depth of sequence in all parent samples.**

**Caption:** Gene expression (y-axis) is plotted against the number of total reads in the measured subsample. A. Each point represents the measurement of a gene in a subsample. Each panel represents a different parent sample. B. Expression of groups of genes with the same expression at higher depths. Each boxplot represents 73 gene measurements. Each panel

contains genes that are expressed within 0.02 of 5.5, 3.5 or 1.5  $\log_2(\text{TPM}+1)$  (horizontal blue lines) at the highest depth.



Figure S2

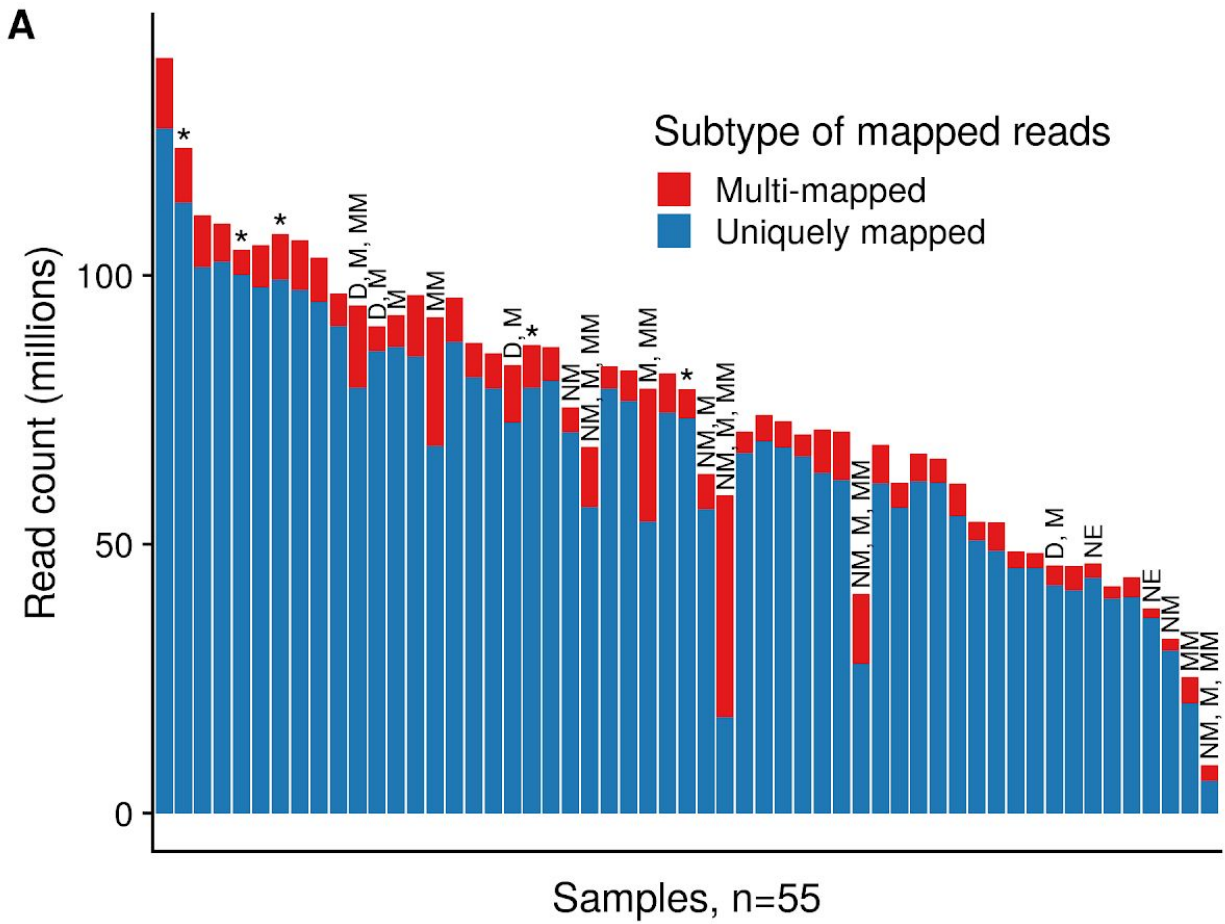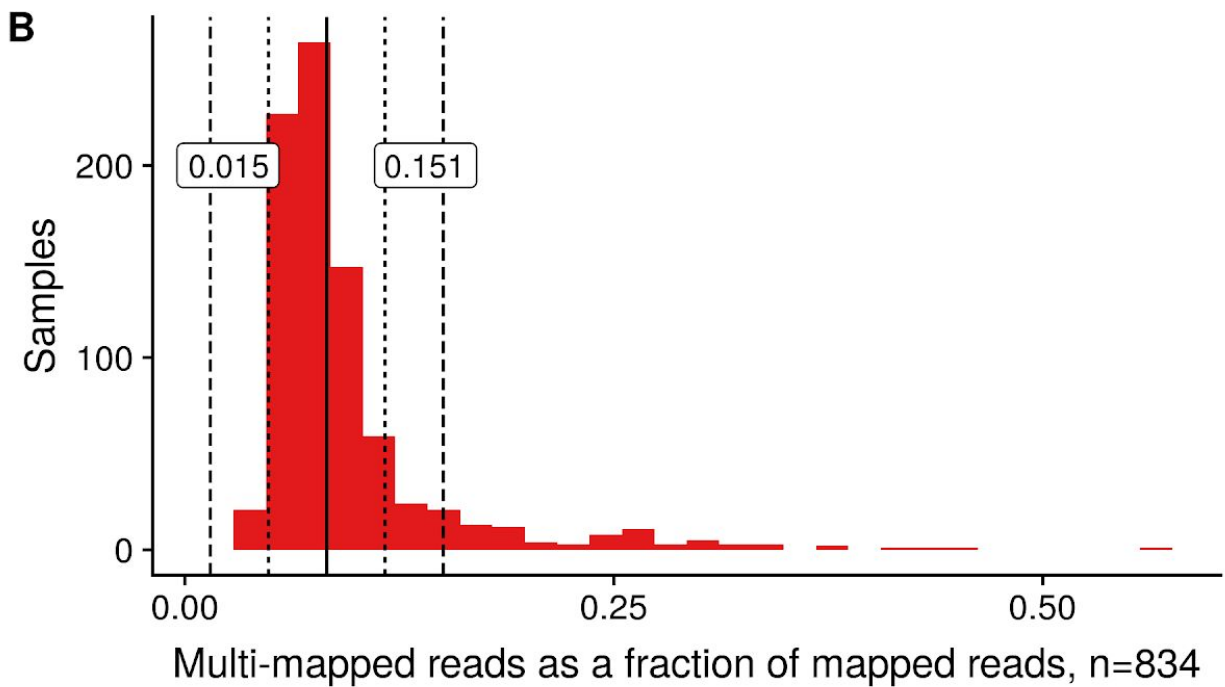

**Figure S2. The fraction of multi-mapped reads is variable.**

Caption: A. Subtypes of mapped reads are present in fifty-five representative RNA-Seq samples, including uniquely mapped (blue) and multi-mapped (red). Asterisks indicate parent samples from Table 1. Samples with text annotations NM (not mapped), D (duplicates), NE (non-exonic), MM (multi-mapped), or M (MEND) have read type ratios outside the limits (Figs 2B, S2B). B. The typical range of multi-mapped reads as a fraction of all mapped reads ( $\mu \pm 2\sigma$ ) is shown for the 834 samples with more than 20 million MEND reads.
